# Supplementary material for: International Analysis of Electronic Health Records of Children and Youth Hospitalized With COVID-19 Infection in 6 Countries
Source: PubMed Central journal article supplement (PMC8196345; doi:10.1001/jamanetworkopen.2021.12596), 2021-06-11
Supplement: jamanetwopen-e2112596-s001.pdf [file jamanetwopen-e2112596-s001.pdf]

## Supplemental Online Content

Bourgeois FT, Gutiérrez-Sacristán A, Keller MS, et al; Consortium for Clinical Characterization of COVID-19 by EHR (4CE). International analysis of electronic health records of children and youth hospitalized with COVID-19 infection in 6 countries. *JAMA Netw Open*. 2021;4(6):e2112596. doi:10.1001/jamanetworkopen.2021.12596

**eTable.** Contributing sites

**eFigure 1.** Federated data collection across participating sites

**eFigure 2.** Forest plots for laboratory values at admission

**eFigure 3.** Sample size plot

**eMethods.** Calculation of temporal trends for laboratory values

This supplemental material has been provided by the authors to give readers additional information about their work.

**eTable1. Contributing Sites**

| Country   | Sites: Healthcare System                    | City             | Hospitals per site | Pediatric beds | Pediatrics discharges per year | Obfuscation threshold | Obfuscation blurring range |
|-----------|---------------------------------------------|------------------|--------------------|----------------|--------------------------------|-----------------------|----------------------------|
| France    | Assistance Publique - Hôpitaux de Paris     | Paris            | 3                  | 1,207          | 58,988                         | <3                    | none                       |
|           | Bordeaux University Hospital                | Bordeaux         | 1                  | 251            | 20,889                         | none                  | none                       |
| USA       | University of Kansas Medical Center         | Kansas City, KS  | 1                  | 19             | 6,500                          | <4                    | none                       |
|           | Mass General Brigham (Partners Healthcare)  | Boston, MA       | 8                  | 150            | 12,000                         | <3                    | +/-3                       |
|           | University of Michigan                      | Ann Arbor, MI    | 1                  | 239            | 8,252                          | none                  | none                       |
|           | University of North Carolina at Chapel Hill | Chapel Hill, NC  | 1                  | 300            | 19,172                         | <10                   | none                       |
|           | Northwestern University                     | Chicago, IL      | 5                  | 193            | 15,748                         | none                  | none                       |
|           | Boston Children's Hospital                  | Boston, MA       | 1                  | 404            | 28,000                         | none                  | none                       |
|           | The Children's Hospital of Philadelphia     | Philadelphia, PA | 1                  | 564            | 25,406                         | none                  | none                       |
|           | University of Pittsburgh / UPMC             | Pittsburgh, PA   | 1                  | 313            | 12,707                         | none                  | none                       |
| Singapore | National University Hospital                | Singapore        | 1                  | 730            | 17,511                         | none                  | none                       |
| Germany   | Medical Center, University of Freiburg      | Freiburg         | 1                  | 124            | 9,000                          | <4                    | none                       |
| UK        | Great Ormond Street Hospital for Children   | London           | 1                  | 423            | 40,273                         | <3                    | none                       |
| Spain     | Hospital Universitario 12 de Octubre        | Madrid           | 1                  | 83             | 5,572                          | <3                    | none                       |

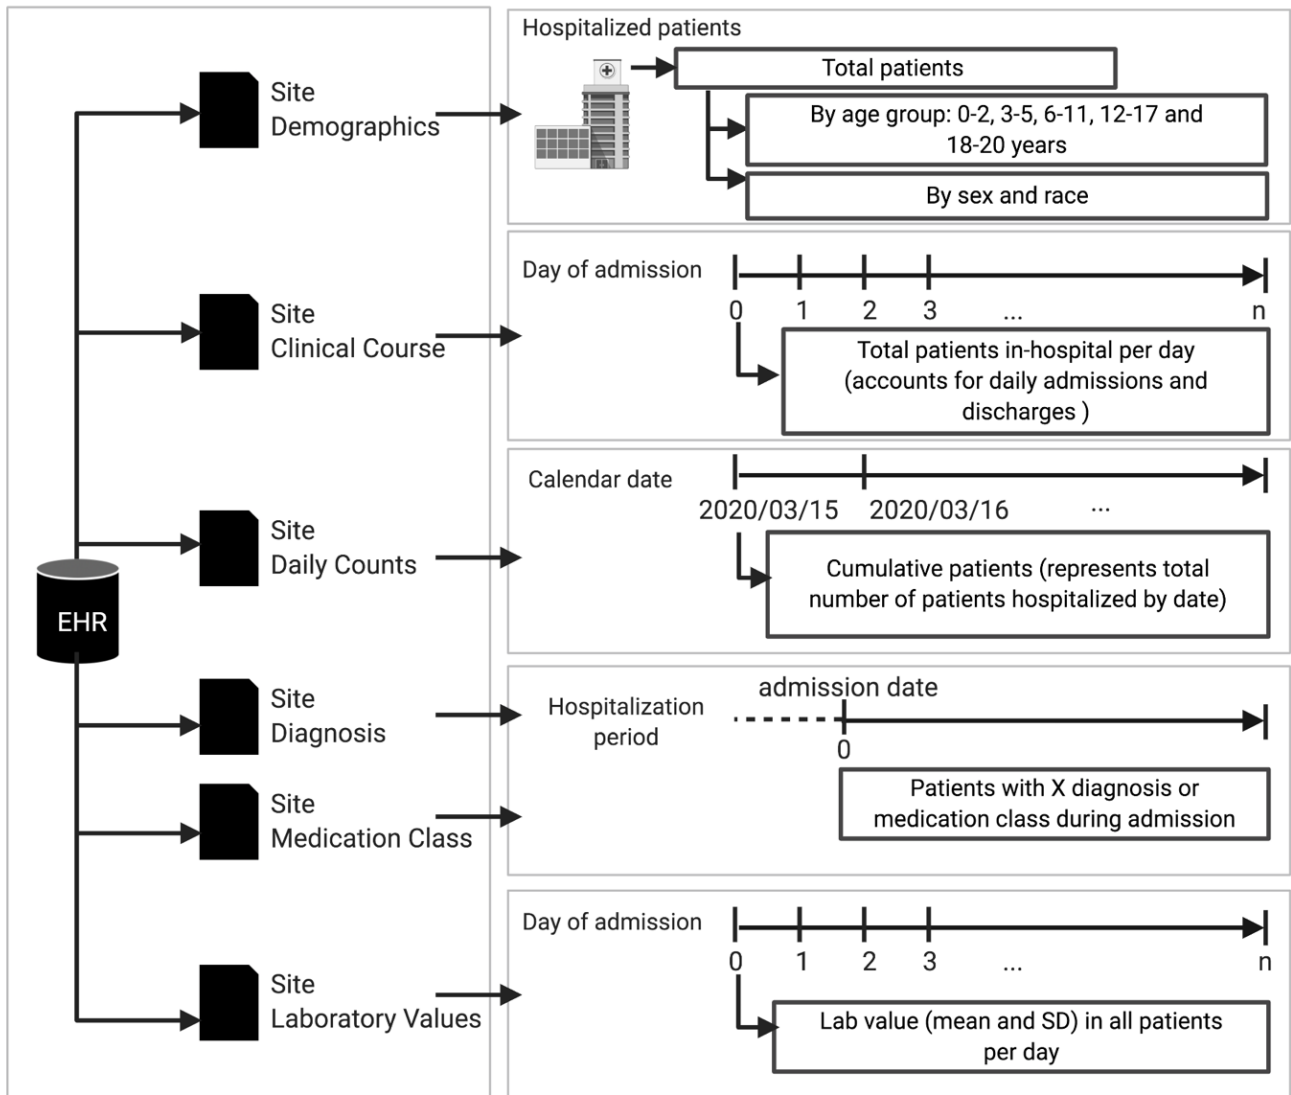

**eFigure 1. Federated data collection across participating sites.** Each site generated six data tables containing aggregate counts and statistics on their patient-level data: 1) demographic breakdowns, 2) clinical course accounts for daily admissions and discharges, 3) cumulative counts of total hospitalized patients, 4) diagnosis counts during hospitalization, 5) medication class counts during hospitalization, and 6) daily trajectories of lab tests. These aggregate descriptive files were provided to the 4CE consortium. This figure has been created with BioRender.com

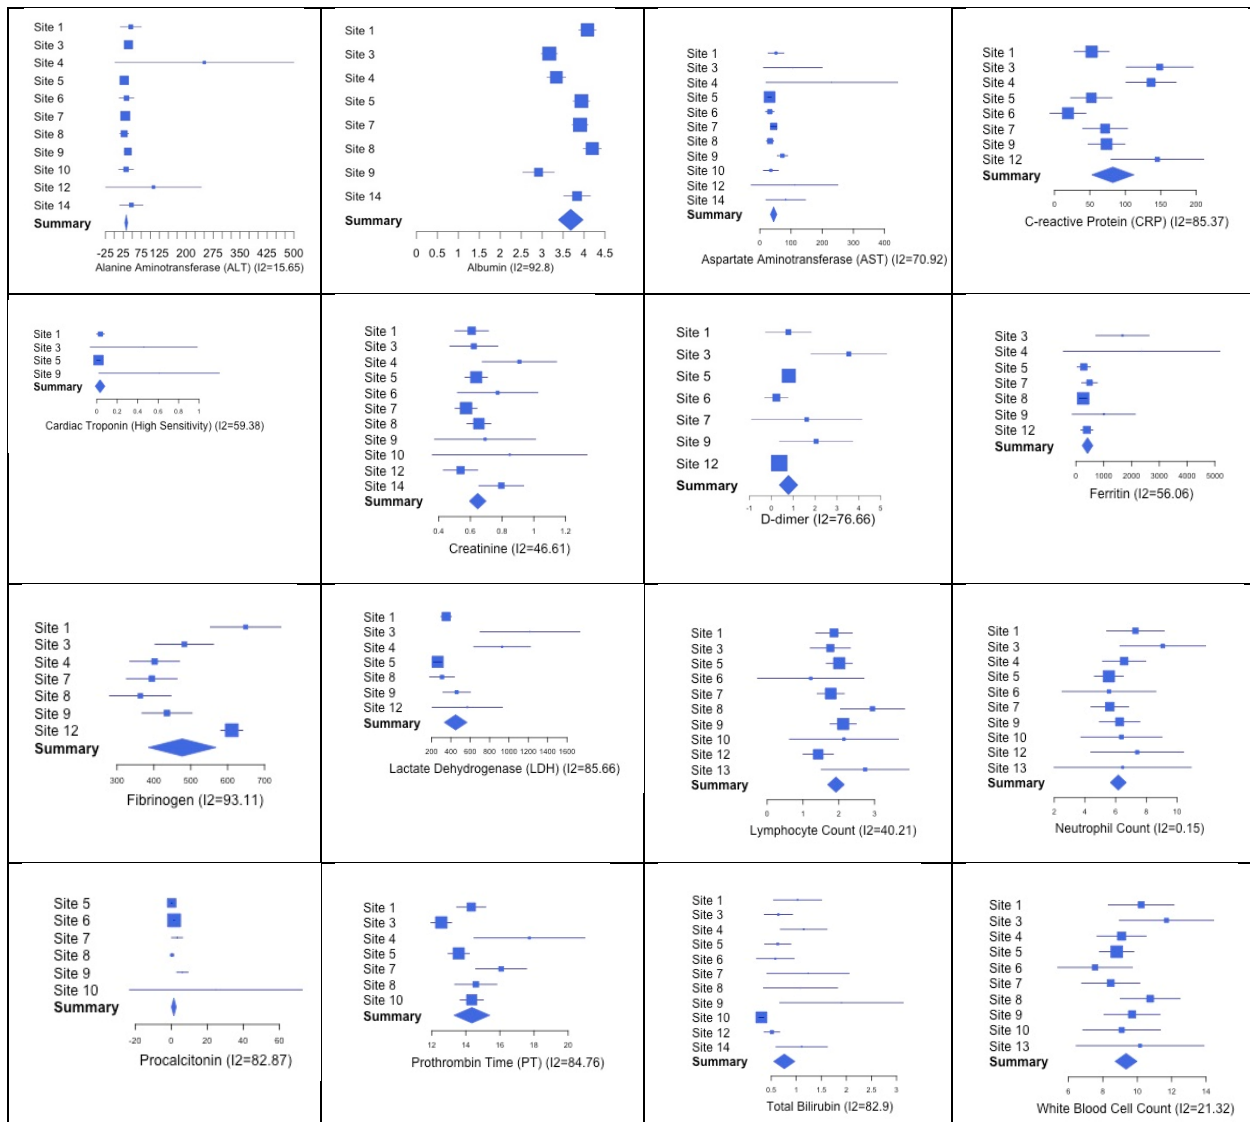

**eFigure 2. Forest plots for laboratory values at admission.** Plots indicate mean values at admission with 95% confidence intervals based on Z-statistic at each site. The heterogeneous structure across different sites supported a random-effects meta-analysis for the statistical model. The aggregated mean values (Summary) and 95% confidence intervals in each forest plot were based on random-effects meta-analysis.

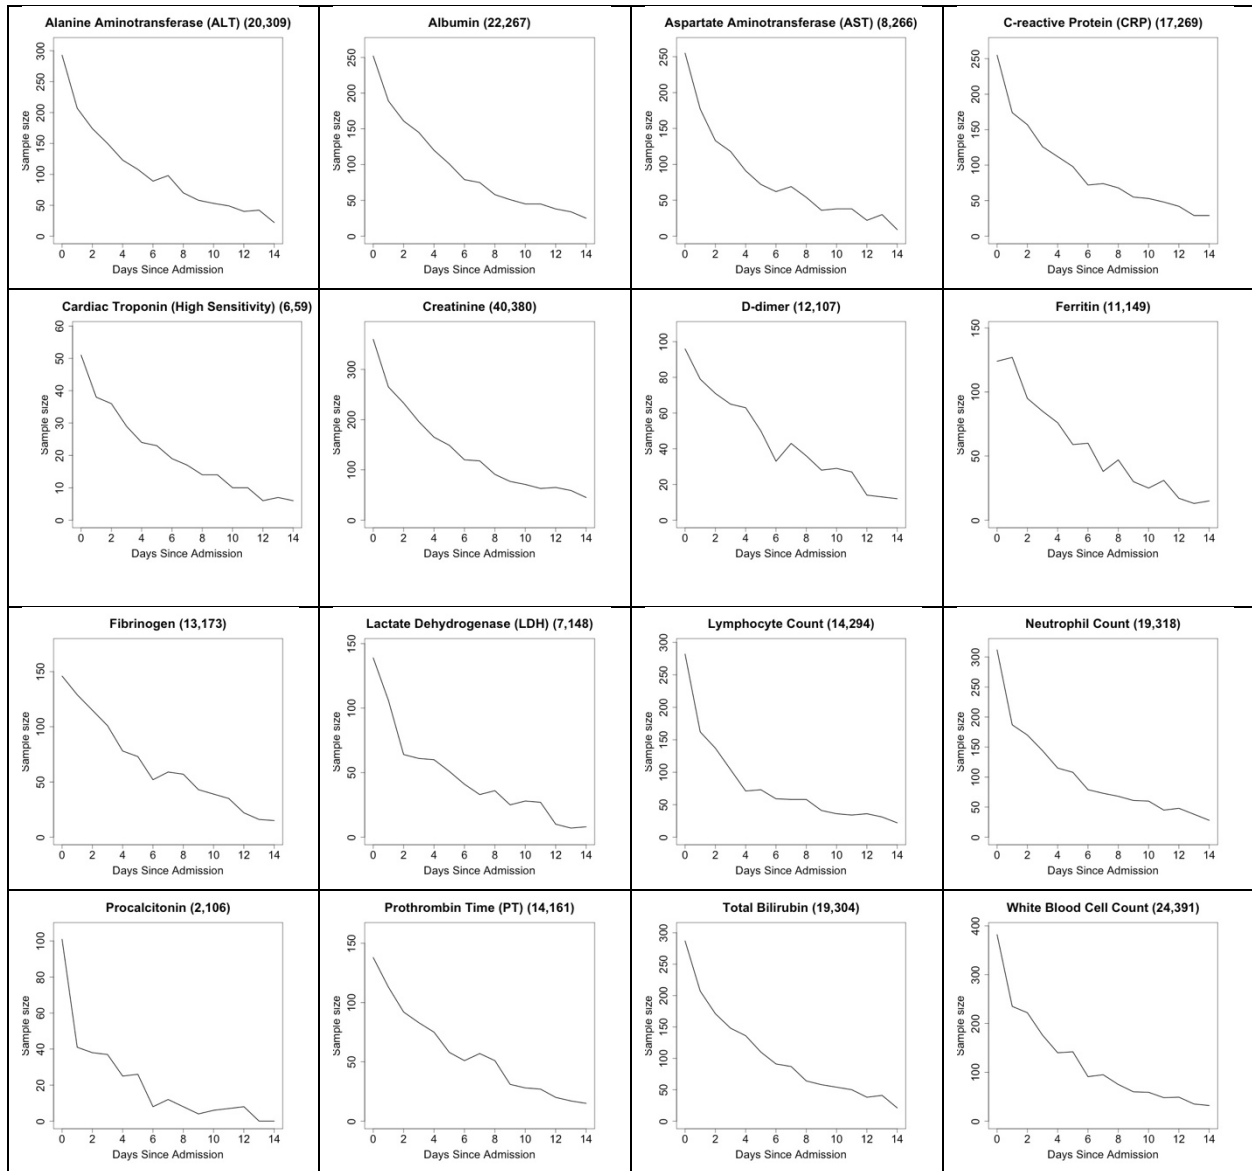

**eFigure 3. Plots of daily sample sizes for the temporal trend analyses over first 14 days of hospitalizations.**

**eMethods. Calculation of temporal trends for laboratory values**

To summarize the temporal trends of laboratory tests, we combined data from sites with at least three observations and analyzed temporal patterns by calculating mean laboratory values on each day of hospitalization, also using random-effects meta-analysis. Specifically, for a specific laboratory test and on each day of hospitalization, we conducted a random-effect meta-analysis using the site level mean and standard error (SE) as input to obtain an overall mean and SE estimate. We then plotted these estimates over the first 14 days of hospitalization.
