# Supplementary material for: International Analysis of Electronic Health Records of Children and Youth Hospitalized With COVID-19 Infection in 6 Countries
Source: PubMed Central journal article supplement (PMC8196345; doi:10.1001/jamanetworkopen.2021.12596), 2021-06-11
Supplement: jamanetwopen-e2112596-s002.pdf [file jamanetwopen-e2112596-s002.pdf]

\*Indicates required information. Only first name, last name, and suffix will appear in PubMed.

| <b>*Group Name(s): Consortium for Clinical Characterization of COVID-19 by EHR (4CE)</b> |                   |                              |                         |                                                                                                 |                                                 |                                                                |                                                                                                   |
|------------------------------------------------------------------------------------------|-------------------|------------------------------|-------------------------|-------------------------------------------------------------------------------------------------|-------------------------------------------------|----------------------------------------------------------------|---------------------------------------------------------------------------------------------------|
| <b>*First Name and Middle Initial(s)</b>                                                 | <b>*Last Name</b> | <b>*Suffix (eg, Jr, III)</b> | <b>Academic Degrees</b> | <b>Institution</b>                                                                              | <b>Location (city, state/province, country)</b> | <b>Role or Contribution, eg, chair, principal investigator</b> | <b>Group (if more than 1 Group listed in the byline and/or Subgroup (eg, Steering Committee))</b> |
| James R                                                                                  | Aaron             |                              | MHA                     | University of Kentucky                                                                          | Lexington, KY, United States of America         | Member                                                         |                                                                                                   |
| Giuseppe                                                                                 | Agapito           |                              | PhD                     | University Magna Graecia of Catanzaro, Italy                                                    | Catanzaro, ITALY                                | Member                                                         |                                                                                                   |
| Adem                                                                                     | Albayrak          |                              |                         | Health Catalyst, INC.                                                                           | Cambridge, MA, United States of America         | Member                                                         |                                                                                                   |
| Mario                                                                                    | Alessiani         |                              | MD, FACS                | ASST Pavia, Lombardia Region Health System                                                      | Pavia, Italy                                    | Member                                                         |                                                                                                   |
| Danilo F                                                                                 | Amendola          |                              | MD                      | Clinical Research Unit of Botucatu Medical School, São Paulo State University, Botucatu, Brazil | Botucatu, Brazil                                | Member                                                         |                                                                                                   |
| François                                                                                 | Angoulvant        |                              | MD,PhD                  | Hôpital Necker-Enfants Malades, Assistance Public-Hôpitaux de Paris, Paris                      | Paris, France                                   | Member                                                         |                                                                                                   |
| Li LLJ                                                                                   | Anthony           |                              |                         | National Center for Infectious Diseases, Tan Tock Seng Hospital, Singapore                      | Novena, Singapore                               | Member                                                         |                                                                                                   |
| Andrew                                                                                   | Atz               |                              | MD                      | Medical University of South Carolina                                                            | Charleston, SC, United States of America        | Member                                                         |                                                                                                   |
| James                                                                                    | Balshi            |                              |                         | St. Luke's University Health Network, Bethlehem PA                                              | Bethlehem, PA, United States of America         | Member                                                         |                                                                                                   |
| Brett K                                                                                  | Beaulieu-Jones    |                              | PhD                     | Harvard Medical School                                                                          | Boston, MA, United States of America            | Member                                                         |                                                                                                   |
| Douglas S                                                                                | Bell              |                              |                         | David Geffen School of Medicine at UCLA                                                         | Los Angeles CA, United States of America        | Member                                                         |                                                                                                   |
| Antonio                                                                                  | Bellasi           |                              |                         | UOC Ricerca, Innovazione e Brand reputation, ASST Papa Giovanni XXIII, Bergamo                  | Bergamo, Italy                                  | Member                                                         |                                                                                                   |
| Riccardo                                                                                 | Bellazzi          |                              | MS, PhD                 | University of Pavia, Italy                                                                      | Pavia, Italy                                    | Member                                                         |                                                                                                   |
| Vincent                                                                                  | Benoit            |                              | PhD                     | APHP Greater Paris University Hospital                                                          | Paris, France                                   | Member                                                         |                                                                                                   |
| Michele                                                                                  | Beraghi           |                              |                         | ASST Pavia                                                                                      | Voghera (PV), Italy                             | Member                                                         |                                                                                                   |
| José Luis                                                                                | Bernal Sobrino    |                              | MS                      | Hospital Universitario 12 de Octubre, Madrid, Spain                                             | Madrid, Spain                                   | Member                                                         |                                                                                                   |
| Mélodie                                                                                  | Bernaux           |                              |                         | APHP Greater Paris University Hospital                                                          | Paris, France                                   | Member                                                         |                                                                                                   |
| Romain                                                                                   | Bey               |                              |                         | APHP Greater Paris University Hospital                                                          | Paris, France                                   | Member                                                         |                                                                                                   |

## Supplemental Online Content: Nonauthor Collaborators

\*Indicates required information. Only first name, last name, and suffix will appear in PubMed.

| *First Name and Middle Initial(s) | *Last Name      | *Suffix (eg, Jr, III) | Academic Degrees | Institution                                                                                                                                                                                           | Location (city, state/province, country)      | Role or Contribution, eg, chair, principal investigator | Group (if more than 1 Group listed in the byline) and/or Subgroup (eg, Steering Committee) |
|-----------------------------------|-----------------|-----------------------|------------------|-------------------------------------------------------------------------------------------------------------------------------------------------------------------------------------------------------|-----------------------------------------------|---------------------------------------------------------|--------------------------------------------------------------------------------------------|
| Alvar                             | Blanco Martínez |                       | MS               | Hospital Universitario 12 de Octubre, Madrid, Spain                                                                                                                                                   | Madrid, Spain                                 | Member                                                  |                                                                                            |
| Silvano                           | Bosari          |                       | Prof.            | IRCCS Ca' Granda Ospedale Maggiore Policlinico di Milano                                                                                                                                              | Milan, Italy                                  | Member                                                  |                                                                                            |
| Robert L                          | Bradford        |                       |                  | North Carolina Translational and Clinical Sciences (NC TraCS) Institute, UNC Chapel Hill                                                                                                              | Chapel Hill, NC, United States of America     | Member                                                  |                                                                                            |
| Gabriel A                         | Brat            |                       | MD               | Harvard Medical School                                                                                                                                                                                | Boston, MA, United States of America          | Member                                                  |                                                                                            |
| Stéphane                          | Bréant          |                       |                  | APHP Greater Paris University Hospital                                                                                                                                                                | Paris, France                                 | Member                                                  |                                                                                            |
| Nicholas W                        | Brown           |                       | MEng             | Harvard Medical School                                                                                                                                                                                | Boston, MA, United States of America          | Member                                                  |                                                                                            |
| William A                         | Bryant          |                       | PhD              | Great Ormond Street Hospital for Children, UK                                                                                                                                                         | London WC1N 3JH, UK                           | Member                                                  |                                                                                            |
| Mauro                             | Bucalo          |                       | MS               | BIOMERIS (BIOMedical Research Informatics Solutions)                                                                                                                                                  | Pavia, Italy                                  | Member                                                  |                                                                                            |
| Anita                             | Burgun          |                       |                  | APHP Greater Paris University Hospital                                                                                                                                                                | Paris, France                                 | Member                                                  |                                                                                            |
| Mario                             | Cannataro       |                       | M.Sc.            | University Magna Graecia of Catanzaro, Italy                                                                                                                                                          | Catanzaro, ITALY                              | Member                                                  |                                                                                            |
| Aldo                              | Carmona         |                       |                  | St. Luke's University Health Network, Bethlehem, PA                                                                                                                                                   | Bethlehem, PA, United States of America       | Member                                                  |                                                                                            |
| Charlotte                         | Caucheteux      |                       |                  | Université Paris-Saclay, Inria, CEA                                                                                                                                                                   | Palaiseau, France                             | Member                                                  |                                                                                            |
| Julien                            | Champ           |                       |                  | INRIA Sophia-Antipolis – ZENITH team, LIRMM, Montpellier, France                                                                                                                                      | Montpellier Cedex 5, France                   | Member                                                  |                                                                                            |
| Krista                            | Chen            |                       | BS               | Boston Children's Hospital                                                                                                                                                                            | Boston, MA, United States of America          | Member                                                  |                                                                                            |
| Jin                               | Chen            |                       | PhD              | University of Kentucky                                                                                                                                                                                | Lexington, KY, United States of America       | Member                                                  |                                                                                            |
| Luca                              | Chiovato        |                       |                  | Unit of Internal Medicine and Endocrinology, Istituti Clinici Scientifici Maugeri SpA SB IRCCS, Pavia, Italy and Department of Internal Medicine and Therapeutics, University of Pavia, Pavia, Italy. | Pavia, Italy                                  | Member                                                  |                                                                                            |
| Lorenzo                           | Chiudinelli     |                       | PhD              | ASST Papa Giovanni XXIII, Bergamo                                                                                                                                                                     | Bergamo, Italy                                | Member                                                  |                                                                                            |
| James J                           | Cimino          |                       | MD               | University of Alabama at Birmingham                                                                                                                                                                   | Birmingham, Alabama, United States of America | Member                                                  |                                                                                            |
| Tiago K                           | Colicchio       |                       | PhD, MBA         | University of Alabama at Birmingham                                                                                                                                                                   | Birmingham, Alabama, United States of America | Member                                                  |                                                                                            |

## Supplemental Online Content: Nonauthor Collaborators

\*Indicates required information. Only first name, last name, and suffix will appear in PubMed.

| *First Name and Middle Initial(s) | *Last Name    | *Suffix (eg, Jr, III) | Academic Degrees | Institution                                                           | Location (city, state/province, country)             | Role or Contribution, eg, chair, principal investigator | Group (if more than 1 Group listed in the byline and/or Subgroup (eg, Steering Committee)) |
|-----------------------------------|---------------|-----------------------|------------------|-----------------------------------------------------------------------|------------------------------------------------------|---------------------------------------------------------|--------------------------------------------------------------------------------------------|
| Sylvie                            | Cormont       |                       |                  | APHP Greater Paris University Hospital                                | Paris, France                                        | Member                                                  |                                                                                            |
| Sébastien                         | Cossin        |                       |                  | Bordeaux University Hospital / ERIAS - Inserm U1219 BPH               | Bordeaux, France                                     | Member                                                  |                                                                                            |
| Jean B                            | Craig         |                       | PhD              | Medical University of South Carolina                                  | Charleston, South Carolina, United States of America | Member                                                  |                                                                                            |
| Juan Luis                         | Cruz Bermúdez |                       | PhD              | Hospital Universitario 12 de Octubre, Madrid, Spain                   | Madrid, Spain                                        | Member                                                  |                                                                                            |
| Arianna                           | Dagliati      |                       | MS, PhD          | University of Pavia, Italy                                            | Pavia, Italy                                         | Member                                                  |                                                                                            |
| Mohamad                           | Daniar        |                       | MSIS             | Boston Children's Hospital                                            | Boston, MA, United States of America                 | Member                                                  |                                                                                            |
| Christel                          | Daniel        |                       |                  | APHP Greater Paris University Hospital, INSERM                        | Paris, France                                        | Member                                                  |                                                                                            |
| Anahita                           | Davoudi       |                       | PhD              | University of Pennsylvania Perelman School of Medicine                | Philadelphia, PA, United States of America           | Member                                                  |                                                                                            |
| Julien                            | Dubiel        |                       |                  | APHP Greater Paris University Hospital                                | Paris, France                                        | Member                                                  |                                                                                            |
| Scott L                           | DuVall        |                       | PhD              | VA Salt Lake City Health Care System                                  | Salt Lake City, UT, United States of America         | Member                                                  |                                                                                            |
| Loic                              | Esteve        |                       |                  | SED/SIERRA, Inria Centre de Paris                                     | Paris, France                                        | Member                                                  |                                                                                            |
| Shirley                           | Fan           |                       |                  | University of Michigan                                                | Ann Arbor, MI, United States of America              | Member                                                  |                                                                                            |
| Robert W                          | Follett       |                       |                  | David Geffen School of Medicine at UCLA                               | Los Angeles, CA, United States of America            | Member                                                  |                                                                                            |
| Paula SA                          | Gaiolla       |                       |                  | Botucatu Medical School, São Paulo State University, Botucatu, Brazil | Botucatu, Brazil                                     | Member                                                  |                                                                                            |
| Thomas                            | Ganslandt     |                       | MD               | University Medicine Mannheim, Heidelberg University                   | Mannheim, Germany                                    | Member                                                  |                                                                                            |
| Lana X                            | Garmire       |                       | PhD              | University of Michigan                                                | Ann Arbor, MI, United States of America              | Member                                                  |                                                                                            |
| Tobias                            | Gradinger     |                       | MD, BSc          | University Medicine Mannheim, Heidelberg University                   | Mannheim, Germany                                    | Member                                                  |                                                                                            |
| Alexandre                         | Gramfort      |                       |                  | Université Paris-Saclay, Inria, CEA                                   | Palaiseau, France                                    | Member                                                  |                                                                                            |
| Romain                            | Griffier      |                       |                  | Bordeaux University Hospital                                          | Bordeaux, France                                     | Member                                                  |                                                                                            |
| Nicolas                           | Griffon       |                       |                  | APHP Greater Paris University Hospital, INSERM                        | Paris, France                                        | Member                                                  |                                                                                            |
| Olivier                           | Grisel        |                       |                  | Université Paris-Saclay, Inria, CEA                                   | Palaiseau, France                                    | Member                                                  |                                                                                            |

## Supplemental Online Content: Nonauthor Collaborators

\*Indicates required information. Only first name, last name, and suffix will appear in PubMed.

| *First Name and Middle Initial(s) | *Last Name    | *Suffix (eg, Jr, III) | Academic Degrees | Institution                                                                                                         | Location (city, state/province, country)             | Role or Contribution, eg, chair, principal investigator | Group (if more than 1 Group listed in the byline and/or Subgroup (eg, Steering Committee)) |
|-----------------------------------|---------------|-----------------------|------------------|---------------------------------------------------------------------------------------------------------------------|------------------------------------------------------|---------------------------------------------------------|--------------------------------------------------------------------------------------------|
| Christian                         | Haverkamp     |                       |                  | Faculty of Medicine and Medical Center, University of Freiburg, Germany                                             | Freiburg, Germany                                    | Member                                                  |                                                                                            |
| Bing                              | He            |                       | PhD              | University of Michigan                                                                                              | Ann Arbor, MI, United States of America              | Member                                                  |                                                                                            |
| Darren W                          | Henderson     |                       |                  | University of Kentucky                                                                                              | Lexington, KY, United States of America              | Member                                                  |                                                                                            |
| Martin                            | Hilka         |                       |                  | APHP Greater Paris University Hospital                                                                              | Paris, France                                        | Member                                                  |                                                                                            |
| John H                            | Holmes        |                       | MS, PhD          | University of Pennsylvania Perelman School of Medicine (inst), Philadelphia, Pennsylvania, United States of America | Philadelphia, PA, United States of America           | Member                                                  |                                                                                            |
| Petar                             | Horki         |                       | PhD              | Faculty of Medicine and Medical Center, University of Freiburg, Germany                                             | Freiburg, Germany                                    | Member                                                  |                                                                                            |
| Kenneth M                         | Huling        |                       | HS               | Harvard Medical School                                                                                              | Boston, MA, United States of America                 | Member                                                  |                                                                                            |
| Anne Sophie                       | Jannot        |                       |                  | HEGP, APHP Greater Paris University Hospital                                                                        | Paris, France                                        | Member                                                  |                                                                                            |
| Vianney                           | Jouhet        |                       | MD,PhD           | Bordeaux University Hospital                                                                                        | Bordeaux, France                                     | Member                                                  |                                                                                            |
| Ramakanth                         | Kavuluru      |                       | PhD              | University of Kentucky                                                                                              | Lexington, KY, United States of America              | Member                                                  |                                                                                            |
| Katie                             | Kirchoff      |                       | MSHI             | Medical University of South Carolina                                                                                | Charleston, South Carolina, United States of America | Member                                                  |                                                                                            |
| Ian D                             | Krantz        |                       |                  | The Children's Hospital of Philadelphia and the Perelman School of Medicine at the University of Pennsylvania       | Philadelphia, PA, United States of America           | Member                                                  |                                                                                            |
| Detlef                            | Kraska        |                       | Dr.              | University Hospital Erlangen                                                                                        | Erlangen, Germany                                    | Member                                                  |                                                                                            |
| Ashok K                           | Krishnamurthy |                       | PhD              | University of North Carolina, Chapel Hill                                                                           | Chapel Hill, NC, United States of America            | Member                                                  |                                                                                            |
| Sehi                              | L'Yi          |                       | PhD              | Harvard Medical School                                                                                              | Boston, MA, United States of America                 | Member                                                  |                                                                                            |
| Trang T                           | Le            |                       | PhD              | University of Pennsylvania Perelman School of Medicine                                                              | Philadelphia, PA, United States of America           | Member                                                  |                                                                                            |
| Judith                            | Leblanc       |                       |                  | APHP Greater Paris University Hospital                                                                              | Paris, France                                        | Member                                                  |                                                                                            |
| Andressa RR                       | Leite         |                       |                  | Clinical Research Unit of Botucatu Medical School, São Paulo State University, Botucatu, Brazil                     | Botucatu, Brazil                                     | Member                                                  |                                                                                            |
| Guillaume                         | Lemaitre      |                       |                  | Université Paris-Saclay, Inria, CEA                                                                                 | Palaiseau, France                                    | Member                                                  |                                                                                            |

## Supplemental Online Content: Nonauthor Collaborators

\*Indicates required information. Only first name, last name, and suffix will appear in PubMed.

| *First Name and Middle Initial(s) | *Last Name | *Suffix (eg, Jr, III) | Academic Degrees | Institution                                                                                           | Location (city, state/province, country)             | Role or Contribution, eg, chair, principal investigator | Group (if more than 1 Group listed in the byline) and/or Subgroup (eg, Steering Committee) |
|-----------------------------------|------------|-----------------------|------------------|-------------------------------------------------------------------------------------------------------|------------------------------------------------------|---------------------------------------------------------|--------------------------------------------------------------------------------------------|
| Leslie                            | Lenert     |                       | MD, MS           | Medical University of South Carolina                                                                  | Charleston, South Carolina, United States of America | Member                                                  |                                                                                            |
| Damien                            | Leprovost  |                       |                  | Clevy.io                                                                                              | Paris, France                                        | Member                                                  |                                                                                            |
| Ne Hooi Will                      | Loh        |                       | MBBS             | National University Health System, Singapore                                                          | Lower Kent Ridge Road, Singapore 119074              | Member                                                  |                                                                                            |
| Kristine E                        | Lynch      |                       | PhD              | VA Salt Lake City Health Care System                                                                  | Salt Lake City, UT, United States of America         | Member                                                  |                                                                                            |
| Sadiqa                            | Mahmood    |                       |                  | Health Catalyst, INC.                                                                                 | Cambridge, MA, United States of America              | Member                                                  |                                                                                            |
| Sarah                             | Maidlow    |                       |                  | University of Michigan                                                                                | Ann Arbor, MI, United States of America              | Member                                                  |                                                                                            |
| Alberto                           | Malovini   |                       | PhD              | Istituti Clinici Scientifici Maugeri SpA SB IRCCS, Pavia, Italy.                                      | Pavia, Italy                                         | Member                                                  |                                                                                            |
| Anupama                           | Maram      |                       | MS               | Harvard Medical School                                                                                | Boston, MA, United States of America                 | Member                                                  |                                                                                            |
| Patricia                          | Martel     |                       |                  | APHP Greater Paris University Hospital                                                                | Boulogne-Billancourt, France                         | Member                                                  |                                                                                            |
| Aaron J                           | Masino     |                       | PhD              | Children's Hospital of Philadelphia                                                                   | Philadelphia, PA, United States of America           | Member                                                  |                                                                                            |
| Michael E                         | Matheny    |                       | MD               | Tennessee Valley Healthcare System Veterans Affairs Medical Center                                    | Nashville, Tennessee, United States of America       | Member                                                  |                                                                                            |
| Thomas                            | Maulhardt  |                       |                  | University Medical Center Freiburg, Germany                                                           | Freiburg, Germany                                    | Member                                                  |                                                                                            |
| Maria                             | Mazzitelli |                       | PhD              | University Magna Graecia of Catanzaro, Italy                                                          | Catanzaro, ITALY                                     | Member                                                  |                                                                                            |
| Michael T                         | McDuffie   |                       |                  | Harvard Medical School                                                                                | Boston, MA, United States of America                 | Member                                                  |                                                                                            |
| Arthur                            | Mensch     |                       |                  | ENS, PSL University                                                                                   | Paris, France                                        | Member                                                  |                                                                                            |
| Marianna                          | Milano     |                       | PhD              | University Magna Graecia of Catanzaro, Italy                                                          | Catanzaro, ITALY                                     | Member                                                  |                                                                                            |
| Marcos F                          | Minicucci  |                       |                  | Internal Medicine Department of Botucatu Medical School, São Paulo State University, Botucatu, Brazil | Botucatu, Brazil                                     | Member                                                  |                                                                                            |
| Jason H                           | Moore      |                       | PhD              | University of Pennsylvania Perelman School of Medicine                                                | Philadelphia, PA, United States of America           | Member                                                  |                                                                                            |
| Cinta                             | Moraleda   |                       | MD,PhD           | Hospital Universitario 12 de Octubre, Madrid, Spain                                                   | Madrid, Spain                                        | Member                                                  |                                                                                            |
| Jeffrey S                         | Morris     |                       |                  | University of Pennsylvania Perelman School of Medicine                                                | Berwyn, PA, United States of America                 | Member                                                  |                                                                                            |

## Supplemental Online Content: Nonauthor Collaborators

\*Indicates required information. Only first name, last name, and suffix will appear in PubMed.

| *First Name and Middle Initial(s) | *Last Name      | *Suffix (eg, Jr, III) | Academic Degrees | Institution                                                                                           | Location (city, state/province, country)             | Role or Contribution, eg, chair, principal investigator | Group (if more than 1 Group listed in the byline and/or Subgroup (eg, Steering Committee)) |
|-----------------------------------|-----------------|-----------------------|------------------|-------------------------------------------------------------------------------------------------------|------------------------------------------------------|---------------------------------------------------------|--------------------------------------------------------------------------------------------|
| Michele                           | Morris          |                       | BA               | University of Pittsburgh                                                                              | Pittsburgh, PA, United States of America             | Member                                                  |                                                                                            |
| Sajad                             | Mousavi         |                       | PhD              | Harvard Medical School                                                                                | Boston, MA, United States of America                 | Member                                                  |                                                                                            |
| Danielle L                        | Mowery          |                       | PhD              | University of Pennsylvania Perelman School of Medicine                                                | Philadelphia, PA, United States of America           | Member                                                  |                                                                                            |
| Douglas A                         | Murad           |                       |                  | David Geffen School of Medicine at UCLA                                                               | Los Angeles, CA, United States of America            | Member                                                  |                                                                                            |
| Thomas P                          | Naughton        |                       | BA               | Harvard Medical School                                                                                | Boston, MA, United States of America                 | Member                                                  |                                                                                            |
| James B                           | Norman          |                       |                  | Harvard Medical School                                                                                | Boston, MA, United States of America                 | Member                                                  |                                                                                            |
| Jihad                             | Obeid           |                       | MD, FAMIA        | Medical University of South Carolina                                                                  | Charleston, South Carolina, United States of America | Member                                                  |                                                                                            |
| Marina P                          | Okoshi          |                       | PhD              | Internal Medicine Department of Botucatu Medical School, São Paulo State University, Botucatu, Brazil | Botucatu, Brazil                                     | Member                                                  |                                                                                            |
| Karen L                           | Olson           |                       | PhD              | Boston Children's Hospital and Harvard Medical School                                                 | Boston, MA, United States of America                 | Member                                                  |                                                                                            |
| Gilbert S                         | Omenn           |                       | MD, PhD          | University of Michigan                                                                                | Ann Arbor, MI, United States of America              | Member                                                  |                                                                                            |
| Nina                              | Orlova          |                       |                  | APHP Greater Paris University Hospital                                                                | Paris, France                                        | Member                                                  |                                                                                            |
| Brian D                           | Ostasiewski     |                       | BS               | Wake Forest School of Medicine                                                                        | Winston-Salem, NC, United States of America          | Member                                                  |                                                                                            |
| Nathan P                          | Palmer          |                       | PhD              | Harvard Medical School                                                                                | Boston, MA, United States of America                 | Member                                                  |                                                                                            |
| Nicolas                           | Paris           |                       |                  | APHP Greater Paris University Hospital                                                                | Paris, France                                        | Member                                                  |                                                                                            |
| Emily R                           | Pfaff           |                       | PhD              | UNC Chapel Hill                                                                                       | Chapel Hill, NC, United States of America            | Member                                                  |                                                                                            |
| Danielle                          | Pillion         |                       | MS               | Harvard Medical School                                                                                | Boston, MA, United States of America                 | Member                                                  |                                                                                            |
| Hans U                            | Prokosch        |                       |                  | University of Erlangen-Nürnberg                                                                       | Erlangen, Germany                                    | Member                                                  |                                                                                            |
| Robson A                          | Prudente        |                       | PhD              | Clinical Research Unit São Paulo State University, Brazil                                             | Botucatu, Brazil                                     | Member                                                  |                                                                                            |
| Víctor                            | Quirós González |                       | MS               | Hospital Universitario 12 de Octubre, Madrid, Spain                                                   | Madrid, Spain                                        | Member                                                  |                                                                                            |
| Rachel B                          | Ramoni          |                       | DMD, ScD         | Department of Veterans Affairs                                                                        | Washington, DC, United States of America             | Member                                                  |                                                                                            |
| Maryna                            | Raskin          |                       |                  | Health Catalyst, INC.                                                                                 | Cambridge, MA, United States of America              | Member                                                  |                                                                                            |
| Siegbert                          | Rieg            |                       | MD               | Medical Center – University of Freiburg, Faculty of Medicine                                          | Freiburg, Germany                                    | Member                                                  |                                                                                            |

## Supplemental Online Content: Nonauthor Collaborators

\*Indicates required information. Only first name, last name, and suffix will appear in PubMed.

| *First Name and Middle Initial(s) | *Last Name     | *Suffix (eg, Jr, III) | Academic Degrees | Institution                                                                                           | Location (city, state/province, country)   | Role or Contribution, eg, chair, principal investigator | Group (if more than 1 Group listed in the byline) and/or Subgroup (eg, Steering Committee) |
|-----------------------------------|----------------|-----------------------|------------------|-------------------------------------------------------------------------------------------------------|--------------------------------------------|---------------------------------------------------------|--------------------------------------------------------------------------------------------|
| Gustavo                           | Roig Domínguez |                       | MS               | Hospital Universitario 12 de Octubre, Madrid, Spain                                                   | Madrid, Spain                              | Member                                                  |                                                                                            |
| Pablo                             | Rojo           |                       | MD, PhD          | Hospital Universitario 12 de Octubre, Madrid, Spain                                                   | Madrid, Spain                              | Member                                                  |                                                                                            |
| Carlos                            | Sáez           |                       | PhD              | Universitat Politècnica de València, Spain                                                            | Valencia, Spain                            | Member                                                  |                                                                                            |
| Elisa                             | Salamanca      |                       |                  | APHP Greater Paris University Hospital                                                                | Paris, France                              | Member                                                  |                                                                                            |
| Malarkodi J                       | Samayamuthu    |                       | MD               | University of Pittsburgh                                                                              | Pittsburgh, PA, United States of America   | Member                                                  |                                                                                            |
| Arnaud                            | Sandrin        |                       |                  | APHP Greater Paris University Hospital                                                                | Paris, France                              | Member                                                  |                                                                                            |
| Janaina CC                        | Santos         |                       | MS               | Clinical Research Unit of Botucatu Medical School, São Paulo State University, Botucatu, Brazil       | Botucatu, Brazil                           | Member                                                  |                                                                                            |
| Maria                             | Savino         |                       | MS               | Management Engineer, Direction                                                                        | Pavia PV, Italy                            | Member                                                  |                                                                                            |
| Emily R                           | Schriver       |                       | MS               | University of Pennsylvania Health System                                                              | Philadelphia, PA, United States of America | Member                                                  |                                                                                            |
| Juergen                           | Schuetzler     |                       |                  | University Hospital Erlangen, FAU Erlangen-Nürnberg, Germany                                          | Erlangen, Germany                          | Member                                                  |                                                                                            |
| Luigia                            | Scudeller      |                       | MD, MSc          | IRCCS Ca' Granda Ospedale Maggiore Policlinico di Milano                                              | Milan, Italy                               | Member                                                  |                                                                                            |
| Patricia                          | Serre          |                       |                  | APHP Greater Paris University Hospital                                                                | Paris, France                              | Member                                                  |                                                                                            |
| Domenick                          | Silvio         |                       |                  | University of Michigan                                                                                | Ann Arbor, MI, United States of America    | Member                                                  |                                                                                            |
| Piotr                             | Sliz           |                       |                  | Boston Children's Hospital                                                                            | Boston, MA, United States of America       | Member                                                  |                                                                                            |
| Jiyeon                            | Son            |                       | MD               | University of Pittsburgh Medical Center                                                               | Pittsburgh PA, United States of America    | Member                                                  |                                                                                            |
| Charles                           | Sonday         |                       |                  | St. Luke's University Health Network, Bethlehm PA                                                     | Bethlehem, PA, United States of America    | Member                                                  |                                                                                            |
| Bryce WQ                          | Tan            |                       | MBBS             | National University Hospital, Singapore                                                               | 1E Kent Ridge Road, Singapore 119228       | Member                                                  |                                                                                            |
| Byorn WL                          | Tan            |                       | MBBS             | National University Hospital, Singapore                                                               | 1E Kent Ridge Road, Singapore 119228       | Member                                                  |                                                                                            |
| Suzana E                          | Tanni          |                       | PhD              | Internal Medicine Department of Botucatu Medical School, São Paulo State University, Botucatu, Brazil | Botucatu, Brazil                           | Member                                                  |                                                                                            |

## Supplemental Online Content: Nonauthor Collaborators

\*Indicates required information. Only first name, last name, and suffix will appear in PubMed.

| *First Name and Middle Initial(s) | *Last Name     | *Suffix (eg, Jr, III) | Academic Degrees | Institution                                                                             | Location (city, state/province, country)   | Role or Contribution, eg, chair, principal investigator | Group (if more than 1 Group listed in the byline and/or Subgroup (eg, Steering Committee)) |
|-----------------------------------|----------------|-----------------------|------------------|-----------------------------------------------------------------------------------------|--------------------------------------------|---------------------------------------------------------|--------------------------------------------------------------------------------------------|
| Ana I                             | Terriza Torres |                       | MS               | Hospital Universitario 12 de Octubre, Madrid, Spain                                     | Madrid, Spain                              | Member                                                  |                                                                                            |
| Valentina                         | Tibollo        |                       | MS               | Istituti Clinici Scientifici Maugeri SpA SB IRCCS, Pavia, Italy.                        | Pavia, Italy                               | Member                                                  |                                                                                            |
| Carlo                             | Torti          |                       | PhD              | University Magna Graecia of Catanzaro, Italy                                            | Catanzaro, ITALY                           | Member                                                  |                                                                                            |
| Enrico M                          | Trecarichi     |                       | PhD              | University Magna Graecia of Catanzaro, Italy                                            | Catanzaro, ITALY                           | Member                                                  |                                                                                            |
| Yi-Ju                             | Tseng          |                       | PhD              | Chang Gung University                                                                   | Guishan, Taoyuan, Taiwan                   | Member                                                  |                                                                                            |
| Andrew K                          | Vallejos       |                       |                  | Clinical & Translational Science Institute, Medical College of Wisconsin                | Milwaukee, WI, United States of America    | Member                                                  |                                                                                            |
| Gael                              | Varoquaux      |                       |                  | Université Paris-Saclay, Inria, CEA, Montréal Neurological Institute, McGill University | Palaiseau, France                          | Member                                                  |                                                                                            |
| Jill-Jënn                         | Vie            |                       |                  | SequeL, Inria Lille                                                                     | Villeneuve-d'Ascq, France                  | Member                                                  |                                                                                            |
| Michele                           | Vitacca        |                       | MD, PhD          | ICS S. Maugeri IRCCS Pavia Italy                                                        | Lumezzane (Bs), Italy                      | Member                                                  |                                                                                            |
| Kavishwar B                       | Wagholikar     |                       | MBBS, PhD        | Department of Medicine, Massachusetts General Hospital, Boston, USA                     | Boston MA, United States of America        | Member                                                  |                                                                                            |
| Lemuel R                          | Waitman        |                       |                  | University of Missouri, Columbia. MO                                                    | Columbia, MO, United States of America     | Member                                                  |                                                                                            |
| Demian                            | Wassermann     |                       |                  | Université Paris-Saclay, Inria, CEA                                                     | Palaiseau, France                          | Member                                                  |                                                                                            |
| Yuan                              | William        |                       |                  | Harvard Medical School                                                                  | Boston, MA, United States of America       | Member                                                  |                                                                                            |
| Zongqi                            | Xia            |                       | MD, PhD          | University of Pittsburgh                                                                | Pittsburgh, PA, United States of America   | Member                                                  |                                                                                            |
| Nadir                             | Yehya          |                       | MD, MSCE         | Children's Hospital of Philadelphia and University of Pennsylvania                      | Philadelphia, PA, United States of America | Member                                                  |                                                                                            |
| Alberto                           | Zambelli       |                       |                  | ASST Papa Giovanni XXIII, Bergamo                                                       | Bergamo, Italy                             | Member                                                  |                                                                                            |
| Harrison G                        | Zhang          |                       |                  | Harvard Medical School                                                                  | Boston, MA, United States of America       | Member                                                  |                                                                                            |
| Chiara                            | Zucco          |                       | PhD              | University Magna Graecia of Catanzaro, Italy                                            | Catanzaro, ITALY                           | Member                                                  |                                                                                            |
